# Supplementary material for: The significance of polymorphisms in genes encoding Il-1β, Il-6, TNFα, and Il-1RN in the pathogenesis of intraventricular hemorrhage in preterm infants
Source: Childs Nerv Syst. 2017 Jun 29;33(11):1905–16. doi: 10.1007/s00381-017-3458-2 (PMC5644703; doi:10.1007/s00381-017-3458-2)
Supplement: Supplementary file 1 — (XLS 27 kb) [file 381_2017_3458_MOESM1_ESM.xls]

## Sheet: Arkusz1
IL-1 beta 3953C>T	IL-1 RN 86pzVNTR	IL-6 -174G>C	IL-6 -596G>A	TNF alfa -308G>A
CC	1/1	GC	GG	GG
CC	1/1	GC	GA	GA
CT	1/1	GC	GG	GG
CC	2/2	GC	GA	GA
CT	1/2	GG	GG	GA
CC	2/2	GC	GA	GG
CC	1/1	GC	GA	GG
TT	2/2	GC	GA	GG
CC	1/3	GC	GA	GG
CT	1/2	GC	GA	GG
CC	2/2	GG	GG	GG
CT	1/1	GG	GG	GG
CT	1/2	GG	GG	GG
CT	1/2	GC	GA	GG
CC	1/2	GC	GA	GA
CC	1/2	GC	GA	GG
TT	1/1	GG	GG	GG
CT	1/1	GC	GA	GG
TT	1/1	GG	GG	GG
CT	2/2	CC	AA	GG
CC	2/2	CC	AA	GG
CT	2/3	CC	AA	GG
CT	1/1	GC	GA	GA
CT	1/1	GC	GA	GG
CC	1/2	GC	GA	GA
TT	1/2	GC	GA	GG
CT	1/1	GG	GG	GG
CC	1/1	CC	AA	GA
CT	1/1	GC	GA	GG
CT	1/2	GC	GA	GG
CC	1/1	CC	AA	GG
CC	1/1	GC	GA	GG
TT	1/2	GC	GA	GA
CC	1/1	GC	GA	GG
CC	1/2	CC	AA	GG
CT	1/1	GC	GA	GG
CT	1/1	GG	GG	GA
CC	1/2	CC	AA	GG
CT	2/2	CC	AA	GG
CT	1/2	CC	AA	GG
CC	1/1	GC	GA	GG
CC	1/2	GG	GG	GG
CC	1/1	GC	GA	GA
CT	1/2	GC	GA	GG
CC	2/2	GC	GA	GG
CT	1/2	GC	GA	GA
TT	1/1	GC	GA	GG
CC	1/1	GC	GA	GG
CC	1/1	GC	GA	GG
CC	1/2	CC	AA	GA
CC	2/2	CC	AA	GA
CC	1/2	GC	GA	GG
CC	1/2	GG	GG	GG
CT	1/2	GC	GA	GG
CC	1/2	GC	GA	GG
CC	1/2	GC	GA	GA
CC	1/1	GC	GA	GG
CC	1/1	GG	GG	GG
CC	1/1	GG	GG	GG
CC	1/1	GC	GA	GG
CT	1/2	CC	AA	GA
CC	1/1	CC	AA	GG
CC	1/1	GG	GG	GA
CC	1/1	GC	GA	GG
CC	1/1	GC	GA	GG
CC	1/2	CC	AA	GG
CC	1/2	CC	AA	GG
CT	1/1	GC	GA	GA
CC	1/1	GC	GA	GG
CC	1/1	GG	GG	GA
CT	1/2	GG	GG	GG
CC	1/1	GC	GA	GG
CC	1/3	GC	GA	GA
CC	2/2	GC	GA	GG
CC	1/1	GC	GA	GG
CC	1/1	GC	GA	GG
CC	2/2	GC	GA	GG
CC	1/1	GG	GG	GG
CT	1/1	GC	GA	GG
TT	1/1	GC	GA	GG
CT	1/1	GC	GA	GG
CC	1/1	GC	GA	GG
CC	1/2	CC	AA	GG
CC	1/1	GC	GA	GG
CC	1/1	GC	GA	GG
CC	2/2	GG	GG	GG
CT	1/1	GG	GG	GG
CT	2/2	GG	GG	GG
CC	1/2	GG	GG	GG
CC	1/1	GC	GA	GA
CT	1/2	GC	GA	GA
CC	2/2	GC	GA	GG
CC	1/1	GG	GG	GA
CC	1/2	GC	GA	GG
CC	1/2	GC	GA	GA
CT	1/1	CC	GA	GG
CC	1/1	GC	GA	GG
CC	1/1	GC	GA	GG
CC	1/2	GC	GA	GG
CT	1/2	CC	AA	GG
